# Supplementary material for: The unfolded protein response affects readthrough of premature termination codons
Source: PubMed Central journal article supplement (PMC4023889; doi:10.1002/emmm.201303347), 2014-04-04
Supplement: emmm0006-0685-sd2.pdf [file emmm0006-0685-sd2.pdf]

**Figure S2: The effect of G418, TM, DTT and NMD inhibition on transcripts levels**

**A. Transcripts levels following G418 treatment**

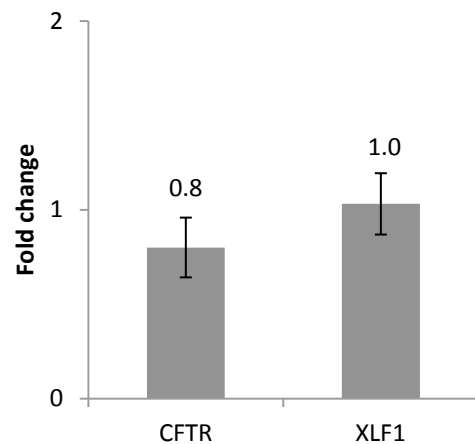

**B. CFP15a treated with TM for 16h**

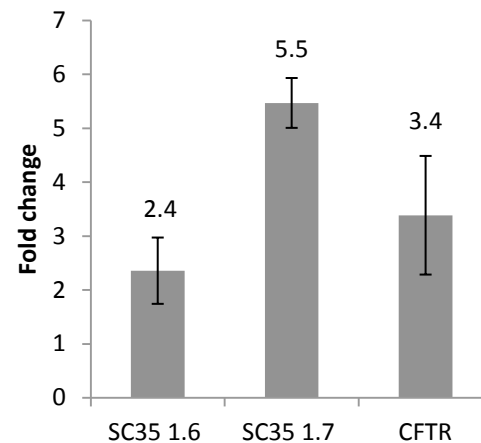

**C. CFP15a siUPF1**

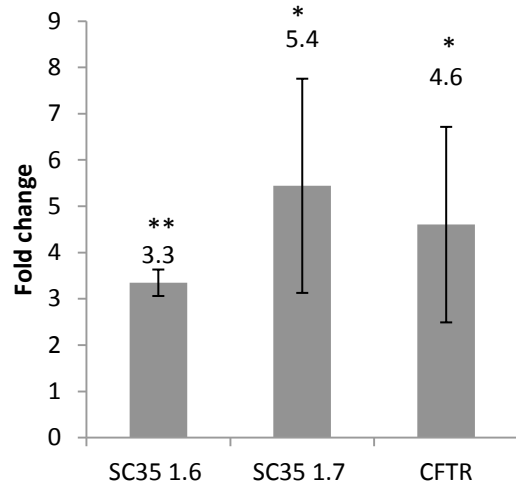

**LPIN1 siUPF1**

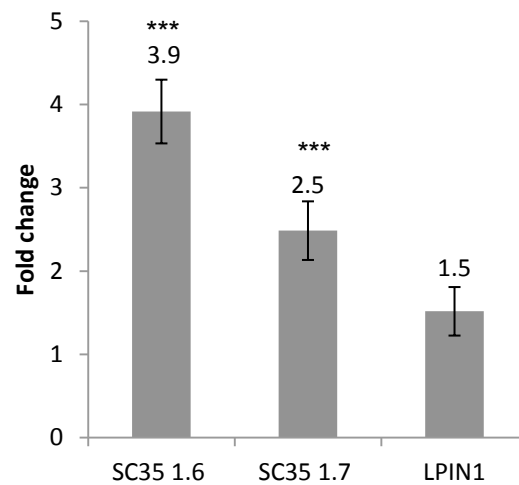

**P133 siUPF1**

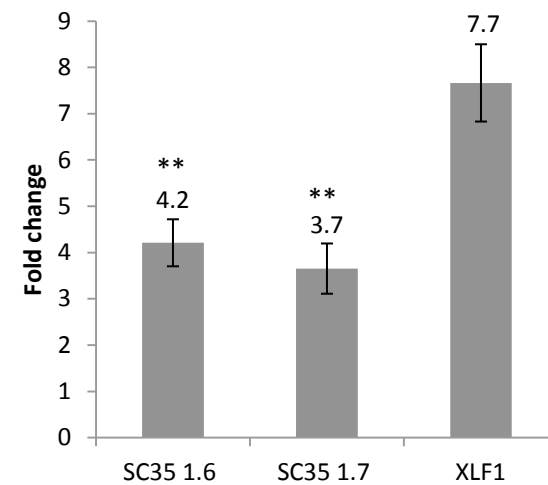

D.

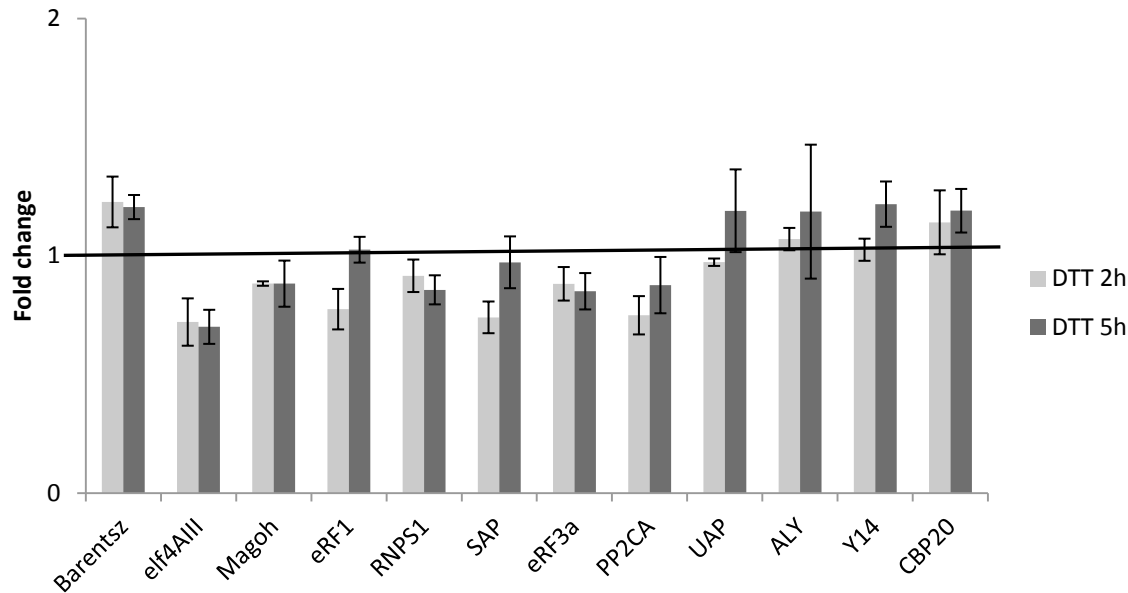

**Figure S2. The effect of G418, TM, DTT and NMD inhibition on transcripts levels. (A)** CFP15a and P133 cells were treated with G418 (250  $\mu\text{g}/\text{ml}$ ) for 48 and 24 hours respectively. **(B)** CFP15a cells were treated with TM for 16 hours. **(C)** CFP15a, LPIN1 and P133 cells were transfected with siRNA against hUPF1 or non-specific control siRNA (scr) for 72h (CFP15a, P133) or 96h (LPIN1). The values shown are the average fold change (mean $\pm$ SEM) from at least three independent experiments relative to non-treated cells. Values were normalized against transcripts of RNA polymerase II gene. Statistical analysis was performed using Student's t test (1 tail, paired). \* $p < 0.05$ , \*\* $p < 0.01$ , \*\*\* $p < 0.001$ . **(D)** HeLa cells were treated with DTT for 2 or 5 hours. The levels of the indicated transcripts were measured by RT-qPCR. The values shown are the average fold change (mean $\pm$ SEM) from at least three independent experiments relative to non-treated cells. Values were normalized against transcripts of RNA polymerase II gene.
