# Supplementary material for: The unfolded protein response affects readthrough of premature termination codons
Source: PubMed Central journal article supplement (PMC4023889; doi:10.1002/emmm.201303347), 2014-04-04
Supplement: emmm0006-0685-sd7.pdf [file emmm0006-0685-sd7.pdf]

**Table S1: Examples of SILAC results** - UPR proteins that are significantly different according to the SILAC-based proteomic analysis.

| <b>UPR function</b>       | <b>Gene name</b>        | <b>Ratio<br/>(6537/6538)</b> | <b>Significant</b> |
|---------------------------|-------------------------|------------------------------|--------------------|
| <b>Chaperone</b>          | PDI 4                   | 0.48043                      | 8.18E-07           |
|                           | BIP (GRP78)             | 0.57458                      | 0.0001312          |
|                           | calreticulin            | 0.61207                      | 0.0006794          |
|                           | Hsp40                   | 0.61127                      | 0.00523            |
|                           | Hsp90                   | 0.54653                      | 0.0000359          |
|                           | Hsp70                   | 0.53123                      | 0.0008272          |
|                           | DnaJ                    | 0.56167                      | 0.005583           |
| <b>Lipid biosynthesis</b> | Fatty acid desaturase 2 | 0.623                        | 0.027964           |
|                           | LACS 4                  | 0.44778                      | 0.0000139          |
|                           | APOL 2                  | 0.443                        | 0.0000259          |
| <b>ERAD</b>               | UBE2J1 (E2)             | 0.38296                      | 1.75E-07           |
