# Supplementary material for: The unfolded protein response affects readthrough of premature termination codons
Source: PubMed Central journal article supplement (PMC4023889; doi:10.1002/emmm.201303347), 2014-04-04
Supplement: emmm0006-0685-sd8.pdf [file emmm0006-0685-sd8.pdf]

**Table S2: Enrichment of Gene Ontology annotations**

| Category value                                        | Enrichment factor | P value     | Benj. Hoch. FDR |
|-------------------------------------------------------|-------------------|-------------|-----------------|
| epidermis development                                 | 10.277            | 5.4102E-08  | 0.00019174      |
| intermediate filament                                 | 8.5639            | 3.7357E-09  | 2.4656E-06      |
| tissue development                                    | 6.978             | 1.8996E-07  | 0.00033661      |
| cellular di-, tri-valent inorganic cation homeostasis | 6.6608            | 0.000047093 | 0.012363        |
| cell surface                                          | 6.3944            | 0.000062607 | 0.0051651       |
| di-, tri-valent inorganic cation homeostasis          | 6.3944            | 0.000062607 | 0.014792        |
| response to virus                                     | 4.8937            | 0.000055231 | 0.013499        |
| response to other organism                            | 4.8309            | 9.5696E-06  | 0.0042393       |
| extracellular region                                  | 4.1814            | 2.4112E-10  | 3.1828E-07      |
| response to biotic stimulus                           | 3.7234            | 6.9996E-06  | 0.0038164       |
| multi-organism process                                | 3.6539            | 0.000067783 | 0.015498        |
| calcium ion binding                                   | 3.3511            | 1.5918E-08  | 0.000062082     |
| response to external stimulus                         | 3.3218            | 0.000015127 | 0.0056433       |
| defense response                                      | 3.2624            | 0.000018929 | 0.0058334       |
| lipid metabolic process                               | 2.708             | 3.1098E-07  | 0.00031489      |
| anatomical structure development                      | 2.6443            | 0.000016783 | 0.0056646       |
| immune system process                                 | 2.61              | 8.7884E-06  | 0.0041528       |
| cellular lipid metabolic process                      | 2.5258            | 0.000015047 | 0.0059253       |
| endoplasmic reticulum part                            | 2.5027            | 0.000017454 | 0.0016456       |
| endoplasmic reticulum membrane                        | 2.4324            | 0.00025727  | 0.01415         |
| regulation of apoptosis                               | 2.4094            | 0.00004612  | 0.012573        |
| regulation of developmental process                   | 2.4083            | 5.0686E-06  | 0.0029939       |
| regulation of programmed cell death                   | 2.3875            | 0.000052874 | 0.013385        |
| endoplasmic reticulum                                 | 2.3405            | 2.1068E-06  | 0.00034762      |
| cytoskeletal part                                     | 2.0196            | 0.00025359  | 0.014554        |
| response to stimulus                                  | 1.9525            | 2.3795E-07  | 0.00033732      |
| developmental process                                 | 1.9404            | 8.1956E-07  | 0.0005809       |
| cell junction                                         | 3.825             | 0.00041384  | 0.01951         |
| plasma membrane part                                  | 2.6629            | 9.4594E-06  | 0.0009605       |

**Table S2.** Fisher Exact Test examined enrichment of Gene Ontology annotations in the set of proteins that are more highly expressed in patients 6538 or 6537. Benjamini Hochberg FDR was set to 0.002.
