# Supplementary material for: The unfolded protein response affects readthrough of premature termination codons
Source: PubMed Central journal article supplement (PMC4023889; doi:10.1002/emmm.201303347), 2014-04-04
Supplement: emmm0006-0685-sd11.pdf [file emmm0006-0685-sd11.pdf]

Table S5: Actual P values for each experiment

| Figure no.  | Cell line          | Gene                      | n               | p. value        | Figure no.      | Cell line                 | Gene                   | n                   | p. value |          |          |
|-------------|--------------------|---------------------------|-----------------|-----------------|-----------------|---------------------------|------------------------|---------------------|----------|----------|----------|
| 4           | CFP15a             | SC35 1.6 2h               | 4               | 1.87E-05        | 6               | HEK293                    | SMG1 siUPF1/scr 2h     | 6                   | 1.27E-02 |          |          |
|             |                    | SC35 1.6 3h               | 4               | 7.70E-04        |                 |                           | SMG1 siUPF1/scr 2h     | 6                   | 2.06E-03 |          |          |
|             |                    | SC35 1.6 5h               | 5               | 3.04E-05        |                 |                           | SMG1 siUPF1/scr 3h     | 4                   | 5.13E-03 |          |          |
|             |                    | SC35 1.7 2h               | 4               | 4.84E-04        |                 |                           | SMG1 siUPF1/scr 3h     | 4                   | 1.34E-02 |          |          |
|             |                    | SC35 1.7 3h               | 4               | 5.71E-03        |                 |                           | ATF3 siUPF1/scr 2h     | 5                   | 5.61E-03 |          |          |
|             |                    | SC35 1.7 5h               | 5               | 1.54E-03        |                 |                           | ATF3 siUPF1/scr 2h     | 5                   | 2.76E-03 |          |          |
|             |                    | CFTR 2h                   | 4               | 1.75E-02        |                 |                           | ATF3 siUPF1/scr 3h     | 5                   | 4.98E-04 |          |          |
|             |                    | CFTR 3h                   | 4               | 7.14E-04        |                 |                           | ATF3 siUPF1/scr 3h     | 5                   | 7.92E-03 |          |          |
|             |                    | CFTR 5h                   | 5               | 8.16E-03        |                 |                           | SC35 1.6 siPERK/scr 3h | 3                   | 1.56E-02 |          |          |
|             | LPIN1              | SC35 1.6 2h               | 4               | 2.45E-03        |                 | CARS siPERK/scr 3h        | 3                      | 3.05E-02            |          |          |          |
|             |                    | SC35 1.6 3h               | 4               | 3.92E-03        |                 | SMG1 siPERK/scr 3h        | 3                      | 2.66E-03            |          |          |          |
|             |                    | SC35 1.6 5h               | 4               | 4.19E-04        |                 | spliced XBP1 (scr/siPERK) | 3                      | 5.00E-02            |          |          |          |
|             |                    | SC35 1.7 2h               | 4               | 4.39E-04        |                 | spliced XBP1              | 3                      | 1.88E-02            |          |          |          |
|             |                    | SC35 1.7 3h               | 4               | 1.59E-03        |                 | S2                        | CFP15a                 | SC35 1.6            | 3        | 2.71E-03 |          |
|             |                    | SC35 1.7 5h               | 4               | 1.04E-04        |                 |                           |                        | SC35 1.7            | 3        | 2.67E-02 |          |
|             |                    | LPIN 1 2h                 | 4               | 2.16E-03        |                 |                           |                        | CFTR                | 3        | 4.98E-02 |          |
|             |                    | P133                      | LPIN 1 3h       | 4               |                 |                           | 2.19E-02               | LPIN1               | SC35 1.6 | 3        | 1.94E-05 |
|             |                    |                           | LPIN 1 5h       | 4               |                 |                           | 5.12E-05               |                     | SC35 1.7 | 3        | 9.54E-04 |
|             | SC35 1.6 2h        |                           | 3               | 9.13E-04        |                 |                           | P133                   |                     | SC35 1.6 | 3        | 3.26E-03 |
|             | SC35 1.6 3h        |                           | 3               | 5.21E-05        |                 |                           |                        | SC35 1.7            | 3        | 6.71E-03 |          |
|             | SC35 1.6 5h        |                           | 3               | 1.50E-02        |                 |                           |                        | XLF11               | 3        | 1.50E-03 |          |
| SC35 1.7 2h | 3                  |                           | 4.37E-02        | S3              | HEK293          |                           | SC35 1.6 siUPF1        | 6                   | 1.57E-05 |          |          |
| SC35 1.7 3h | 3                  |                           | 2.24E-03        |                 |                 | SC35 1.6 2h               | 3                      | 3.72E-03            |          |          |          |
| SC35 1.7 5h | 3                  |                           | 5.72E-02        |                 |                 | SC35 1.6 3h               | 3                      | 7.46E-04            |          |          |          |
| XLF1 3h     | 3                  |                           | 5.75E-03        |                 |                 | SC35 1.6 5h               | 3                      | 1.61E-04            |          |          |          |
| XLF1 5h     | 3                  | 7.57E-04                  | SC35 1.7 siUPF1 |                 |                 | 7                         | 3.23E-05               |                     |          |          |          |
| 5           | HEK293             | SC35 1.6                  | 6               |                 |                 | 1.57E-05                  | SC35 1.7 2h            | 3                   | 4.14E-03 |          |          |
|             |                    | SC35 1.7                  | 6               |                 |                 | 3.23E-05                  | SC35 1.7 3h            | 3                   | 2.08E-04 |          |          |
|             |                    | CARS                      | 6               |                 |                 | 4.11E-05                  | SC35 1.7 5h            | 3                   | 5.41E-03 |          |          |
|             | HeLa               | SC35 1.6                  | 7               |                 |                 | 3.93E-07                  | CARS siUPF1            | 8                   | 4.11E-05 |          |          |
|             |                    | SC35 1.7                  | 6               | 4.32E-05        | CARS 2h         | 3                         | 1.32E-02               |                     |          |          |          |
|             |                    | CARS                      | 5               | 6.36E-05        | CARS 3h         | 3                         | 2.74E-03               |                     |          |          |          |
|             | CFP15a             | SC35 1.6                  | 4               | 2.71E-03        | CARS 5h         | 3                         | 2.90E-04               |                     |          |          |          |
|             |                    | SC35 1.7                  | 4               | 2.67E-02        | SC35 1.6 siUPF1 | 7                         | 3.93E-07               |                     |          |          |          |
|             |                    | CARS                      | 4               | 1.36E-02        | SC35 1.6 2h     | 3                         | 7.30E-03               |                     |          |          |          |
| 6           | HEK293             | ATF3                      | 3               | 7.81E-03        | SC35 1.6 3h     | 3                         | 2.23E-03               |                     |          |          |          |
|             |                    | ATF4                      | 3               | 2.35E-03        | SC35 1.6 5h     | 3                         | 3.33E-05               |                     |          |          |          |
|             |                    | CHOP                      | 3               | 4.07E-02        | SC35 1.7 siUPF1 | 6                         | 4.32E-05               |                     |          |          |          |
|             |                    | ASNS                      | 3               | 1.21E-02        | SC35 1.7 3h     | 3                         | 6.47E-03               |                     |          |          |          |
|             |                    | UPF2 siUPF1               | 3               | 2.70E-02        | SC35 1.7 5h     | 3                         | 1.39E-03               |                     |          |          |          |
|             |                    | UPF2 DTT 2h               | 3               | 4.90E-02        | CARS siUPF1     | 5                         | 6.36E-05               |                     |          |          |          |
|             |                    | UPF2 DTT 5h               | 3               | 1.05E-02        | CARS 2h         | 3                         | 1.84E-02               |                     |          |          |          |
|             |                    | UPF3a DTT 2h              | 3               | 4.93E-02        | CARS 3h         | 3                         | 9.50E-03               |                     |          |          |          |
|             |                    | UPF3b siUPF1              | 3               | 1.08E-02        | CARS 5h         | 3                         | 1.02E-03               |                     |          |          |          |
|             | HeLa               | UPF3b DTT 2h              | 3               | 1.14E-02        | CFP15a          | SC35 1.6 siUPF1           | 4                      | 2.71E-03            |          |          |          |
|             |                    | UPF3b DTT 5h              | 3               | 8.88E-04        |                 | SC35 1.6 2h               | 4                      | 1.87E-05            |          |          |          |
|             |                    | SMG1 siUPF1               | 3               | 9.12E-03        |                 | SC35 1.6 3h               | 3                      | 7.70E-04            |          |          |          |
|             |                    | SMG1 DTT 2h               | 3               | 1.79E-04        |                 | SC35 1.6 5h               | 5                      | 3.04E-05            |          |          |          |
|             |                    | SMG1 DTT 5h               | 3               | 1.80E-05        |                 | SC35 1.7 siUPF1           | 4                      | 2.67E-02            |          |          |          |
|             |                    | SMG5 siUPF1               | 3               | 6.01E-03        |                 | SC35 1.7 2h               | 4                      | 4.84E-04            |          |          |          |
|             |                    | SMG5 DTT 2h               | 3               | 2.18E-02        |                 | SC35 1.7 3h               | 3                      | 5.71E-03            |          |          |          |
|             |                    | SMG5 DTT 5h               | 3               | 6.11E-04        |                 | SC35 1.7 5h               | 5                      | 1.54E-03            |          |          |          |
|             |                    | SMG6 DTT 2h               | 3               | 3.91E-03        |                 | CARS siUPF1               | 3                      | 1.36E-02            |          |          |          |
|             | HEK293             | SMG6 DTT 5h               | 3               | 4.37E-04        | S4              | HEK293                    | spliced XBP1 siUPF1    | 8                   | 1.39E-05 |          |          |
|             |                    | SMG7 DTT 2h               | 3               | 1.08E-02        |                 |                           | spliced XBP1 2h        | 3                   | 4.10E-03 |          |          |
|             |                    | SMG7 DTT 5h               | 3               | 1.12E-02        |                 |                           | spliced XBP1 3h        | 3                   | 6.78E-04 |          |          |
|             |                    | spliced XBP1 (scr/siUPF1) | 5               | 2.97E-02        |                 |                           | spliced XBP1 5h        | 3                   | 5.95E-04 |          |          |
|             |                    | SC35 1.6 siUPF1/scr 2h    | 6               | 9.18E-05        |                 |                           | HeLa                   | spliced XBP1 siUPF1 | 7        | 4.96E-05 |          |
|             |                    | SC35 1.6 siUPF1/scr 2h    | 6               | 3.28E-04        |                 |                           | spliced XBP1 2h        | 3                   | 1.56E-02 |          |          |
|             |                    | SC35 1.6 siUPF1/scr 3h    | 5               | 1.44E-03        |                 |                           | spliced XBP1 3h        | 4                   | 4.39E-05 |          |          |
|             |                    | SC35 1.6 siUPF1/scr 3h    | 5               | 6.38E-04        |                 |                           | spliced XBP1 5h        | 4                   | 1.42E-04 |          |          |
|             |                    | CARS siUPF1/scr 2h        | 6               | 2.96E-02        |                 |                           | CFP15a                 | spliced XBP1 siUPF1 | 4        | 2.91E-03 |          |
|             | CARS siUPF1/scr 2h | 6                         | 2.68E-02        | spliced XBP1 2h | 4               | 1.47E-04                  |                        |                     |          |          |          |
|             | CARS siUPF1/scr 3h | 5                         | 2.92E-02        | spliced XBP1 3h | 3               | 8.11E-04                  |                        |                     |          |          |          |
|             | CARS siUPF1/scr 3h | 5                         | 1.73E-02        | spliced XBP1 5h | 5               | 1.16E-03                  |                        |                     |          |          |          |

(n) = number of independent experiments
